# Supplementary material for: Menstrual disturbances in British Servicewomen: A cross-sectional observational study of prevalence and risk factors
Source: Frontiers journal article supplement (doi:10.3389/fnut.2022.984541), 2022-10-19
Supplement: Data_Sheet_1.PDF [file Data_Sheet_1.PDF]

## **Section A: About You**

This section will ask you questions about yourself, such as your height, ethnicity and smoking habits. For 'free text answer options please do not include any identifying personal information.

### **1. What is your age?**

Scale (years): 16 – 19; 20 – 24; 25 – 29; 30 – 34; 37 – 37; 38 – 40; 41 - 44

### **2. What is your height?**

Scale (cm): Less than 150; 150 – 154; 155 – 159; 160 – 164; 165 – 169; 170 – 174; 175 – 179; 180 – 184 – 185 – 189; 190 or above.

### **3. What is your weight?**

Scale (kg): Less than 45; 45 – 49; 50 – 54; 55 – 59; 60 – 64; 65 – 69; 70 – 74; 75 – 79; 80 – 84; 85 – 89; 90 – 94; 95 – 99; 100 or greater

### **4. What was your lowest adult weight? (an adult is classified as anyone who is aged 18 years old and over)**

Scale (kg): Less than 45; 45 – 49; 50 – 54; 55 – 59; 60 – 64; 65 – 69; 70 – 74; 75 – 79; 80 – 84; 85 – 89; 90 – 94; 95 – 99; 100 or greater

### **5. How old were you when you were at your lowest adult weight?**

Scale (years): 16 – 19; 20 – 24; 25 – 29; 30 – 34; 37 – 37; 38 – 40; 41 - 44

### **6. What was your highest adult weight? (please do not include your weight during pregnancy)**

Scale (kg): Less than 45; 45 – 49; 50 – 54; 55 – 59; 60 – 64; 65 – 69; 70 – 74; 75 – 79; 80 – 84; 85 – 89; 90 – 94; 95 – 99; 100 or greater

### **7. What is your ethnic group?**

Scale: White; Asian; Black/African/Caribbean; Mixed/Multiple ethnicities; Other; Unknown/prefer not to say

### **8. Are you pregnant or currently nursing?**

Scale: Yes/No

### **9. If yes to 8, how many previous full-term pregnancies have you had?**

Scale: 1; 2; 3; 4; 5 or more

### **10. Do you currently smoke? (Smoking is defined as someone who smokes a tobacco product at least once a day)?**

Scale: Yes/No

### **11. If yes to 10, how many per day?**

Scale: 1 - 5; 5 - 10; 11 – 15; 16 or more

### **12. (If no to 10) Did you previously smoke?**

Scale: Yes/No

### **13. (If yes to 12) When did you stop?**

Scale: Within the last 3 months; Within the last 12 months; Over 1 year ago; Over 2 years ago

## **Section B: About Your Job**

For 'free text answer options please do not include any identifying personal information.

### **14. How long have you been in the military?**

Scale: Less than a year; 1- 5 years; 6 – 10 years; 11 – 15 years; 16 – 20 years; 21- 25 years

### **15. What is your service?**

Scale: Royal Navy; Royal Marines; Army; Royal Air Force

### **16. Are you in Regular or Reserve Service?**

Scale: Regular; Reserve; Full Time Reserve Service

### **17. Have you had a break in Service?**

Scale: Yes; No

### **18. What is your rank?**

Scale: (Army): Recruit; Private; Lance Corporal; Corporal; Sergeant; Staff Sergeant; Warrant Officer 1; Warrant Officer 2; Officer Cadet; Second Lieutenant; Lieutenant; Captain; Major; Lieutenant Colonel and above

Scale: (Royal Navy): Recruit; Able Rate; Seaman; Leading Hand; Petty Officer; Chief Petty Officer; Warrant Officer 1; Warrant Officer 2; Officer Cadet; Midshipman; Sub Lieutenant; Lieutenant; Lieutenant Commander; Commander and above

Scale: (Royal Air Force): Recruit; Aircraftman; Senior Aircraftman; Corporal; Sergeant; Chief Technician; Flight Sergeant; Warrant Officer; Officer Cadet; Pilot Officer; Flying Officer; Flight Lieutenant; Squadron Leader; Wing Commander and above

Scale: (Royal Marines): Recruit; Marine; Lance Corporal; Corporal; Sergeant; Colour Sergeant; Warrant Officer 1; Warrant Officer 2; Second Lieutenant; Lieutenant; Captain; Major; Lieutenant Colonel and above

### **19. What is your career employment group?**

Scale: Engineering; Logistics; Combat/Warfare; Intelligence, IT, and Communications; HR, Finance, Personnel Support, and Education Training Services; Medical; Music and Ceremonial/ Royal Marines Band; Aviation and Air Crew; Air Operations Support; Chaplaincy; Force Protection; Other

### **20. Are you medically fit to deploy (MFD)?**

Scale: Yes/No

### **21. (If No to 20) Please specify why?**

Scale: Musculoskeletal injury; Medical condition; Prefer not to say; Other

### **22. How physically hard do you find your job?**

Scale: Very very light; very light; fairly light; somewhat hard; hard; very hard; very very hard.

### **23. How many hours do you typically sleep per night?**

Scale: Less than 4; 4 – 5; 5 – 6; 6 – 7; 7 – 8; More than 8

### **24. How many days have you been on field exercises in the last 12 months?**

Scale: 0; 1-10; 10-20; 21 and above

**25. How many days have you been on physically arduous training courses in the last 12 months (e.g., Section or Platoon Commander's Battle Course)?**

Scale: 0; 1-10; 10-20; 21 or more

**26. How many deployments (overseas or domestic) have you been on in your career?**

Scale: 0; 1; 2; 3; 4; 5; 6; 7; 8; 9; 10; Other (Please specify)

### **Section C: Eating Behaviours (FAST [30 to 62] / BDA-Q [64 to 72])**

This section explores areas relating to your eating and exercise habits. It includes questions about diet, weight, allergies and exercise/training. For 'free text answer options please do not include any identifying personal information.

**27. Do you follow a vegetarian or vegan diet?**

Scale: Yes/No

**28. Do you have any food allergies, intolerances or restrict any food groups?**

Scale: Yes/No

**29. (If yes to 28), please specify?**

Scale: Celery; Cereals containing gluten (barley, wheat, rye); Crustaceans (eg: crab, lobster, prawns); Egg; Fish; Milk/dairy/Lactose; Mustard; Nuts; Peanuts; Sesame seed; Soya; Sulphites; Other

**30. I participate in additional recreational physical activity over 20 minutes in length on days that I have physical training or field exercise.**

Scale: Frequently; Sometimes; Rarely; Never

**31. If I cannot exercise, I find myself worrying that I will gain weight.**

Scale: Frequently; Sometimes; Rarely; Never

**32. I believe that most female soldiers have some form of disordered eating habit.**

Scale: Strongly agree; Agree; Disagree; Strongly disagree

**33. During training, I control my fat, carbohydrate, and calorie intake carefully.**

Scale: Frequently; Sometimes; Rarely; Never

**34. I will eat foods that have more than 3 grams of fat. (1 teaspoon of butter is 3g of fat)**

Scale: Strongly agree; Agree; Disagree; Strongly disagree

**35. I feel that my performance would improve if I lost weight.**

Scale: Strongly agree; Agree; Disagree; Strongly disagree

**36. If I weighed myself tomorrow and gained 2 pounds, I would exercise harder or longer than usual.**

Scale: Frequently; Sometimes; Rarely; Never

**37. I weigh myself:**

Scale: Daily; 2 or more times a week; Weekly; Monthly or less

**38. If I choose to complete additional exercise on a day of physical training or field exercise, I exercise for:**

Scale: 2 or more hours; 1 – 2 hours; 45 – 60 minutes; 30-44 minutes; less than 30 minutes; I choose to do not additional exercise

**39. If I know that I will be consuming alcoholic beverages, I will skip meals on that day or the following day.**

Scale: Frequently; Sometimes; Rarely; Never

**40. I feel guilty if I choose fried foods for a meal.**

Scale: Frequently; Sometimes; Rarely; Never

**41. If I were injured, I would still exercise even if I were instructed not to do so by my physical training instructor or doctor.**

Scale: Strongly agree; Agree; Disagree; Strongly disagree

**42. I take dietary or herbal supplements to increase my metabolism and/or to assist in burning fat.**

Scale: Frequently; Sometimes; Rarely; Never

**43. I am concerned about my level of body fat.**

Scale: Frequently; Sometimes; Rarely; Never

**44. Being in the military, I am very conscious about consuming adequate calories and nutrients on a daily basis.**

Scale: Frequently; Sometimes; Rarely; Never

**45. I am worried that if I were to gain weight, my performance would decrease.**

Scale: Strongly agree; Agree; Disagree; Strongly disagree

**46. I think that being thin is associated with my physical performance.**

Scale: Strongly agree; Agree; Disagree; Strongly disagree

**47. I train intensely for my job or sport to make sure I will not gain weight.**

Scale: Frequently; Sometimes; Rarely; Never

**48. Has the amount of food you eat changed since the initial COVID-19 'Lockdown' on 23<sup>rd</sup> March 2020?**

Scale: No change; I eat a lot more now; I eat a little more now; I eat a little less now; I eat a lot less now

**49. I choose to exercise on days off or "rest days".**

Scale: Frequently; Sometimes; Rarely; Never

**50. My friends tell me that I am thin, but I feel fat.**

Scale: Frequently; Sometimes; Rarely; Never

**51. I feel uncomfortable eating around others.**

Scale: Frequently; Sometimes; Rarely; Never

**52. I limit the amount of carbohydrates I eat.**

Scale: Frequently; Sometimes; Rarely; Never

**53. I try to lose weight to please others.**

Scale: Frequently; Sometimes; Rarely; Never

**54. If I were unable to train in my job, I would not feel good about myself.**

Scale: Strongly agree; Agree; Disagree; Strongly disagree

**55. If I were injured and unable to exercise, I would restrict my caloric intake.**

Scale: Strongly agree; Agree; Disagree; Strongly disagree

**56. In the past 2 years I have been unable to undertake my job due to an injury.**

Scale: 7 or more times; 4-6 times; 1-3 times; No significant injuries

**57. During work I have trouble concentrating due to feelings of guilt about what I have eaten that day.**

Scale: Frequently; Sometimes; Rarely; Never

**58. I feel that I have a lot of good qualities.**

Scale: Strongly agree; Agree; Disagree; Strongly disagree

**59. At times I feel that I am no good at all.**

Scale: Strongly agree; Agree; Disagree; Strongly disagree

**60. I strive for perfection in all aspects of my life.**

Scale: Strongly agree; Agree; Disagree; Strongly disagree

**61. I avoid eating meat to stay thin.**

Scale: Strongly agree; Agree; Disagree; Strongly disagree

**62. I am happy with my present weight.**

Scale: Yes; No

**63. I have done things to keep my weight down that I believe are unhealthy.**

Scale: Frequently; Sometimes; Rarely; Never

**64. I always feel guilty after overeating**

Scale: Always; usually; often, sometimes, rarely, never

**65. I am preoccupied with the desire to be thinner**

Scale: Always; usually; often, sometimes, rarely, never

**66. I think that my stomach is too big**

Scale: Always; usually; often, sometimes, rarely, never

**67. I feel satisfied with the shape of my body**

Scale: Always; usually; often, sometimes, rarely, never

**68. My parents have expected excellence of me**

Scale: Always; usually; often, sometimes, rarely, never

**69. As a child, I tried very hard to avoid disappointing my parents and teachers**

Scale: Always; usually; often, sometimes, rarely, never

**70. Are you trying to lose weight now?**

Scale: Yes/No

**71. Have you tried to lose weight previously?**

Scale: Yes/No

**72. (If yes to 71) How many times have you tried to lose weight?**

Scale: 1-2; 3-5; over 5 times

**73. Have you ever been diagnosed with an eating disorder e.g., Anorexia, bulimia?**

Scale: Yes/No



#### **Section D: Exercise Behaviours, Illness, and Injury (LEAF-Q [84 to 93])**

This section explores areas relating to other aspects of your exercise habits, injuries and illness. It includes questions about what type of exercise/training you do and how often, and exercise/training associated with your job. For 'free text' answer options please do not include any identifying personal information.

**74. Did you previously take part in sport or physical activity as a child (aged 12 to 16 years)?**

Scale: Running; Cycling; Swimming; Triathlon; Gymnastics; Weightlifting; Combat sports/Martial Arts; Ball sports; Racket sports; Track and Field; Cross-fit; Dance; Other (please specify); No

**75. (If yes to 74), did your sport or activity require you to be lean for either aesthetic or performance reasons, or to make weight?**

Scale: Yes/No

**76. Do you play representative sport in the military?**

Scale: Yes, for my Service; Yes, for my Corps/Region/Branch; Yes, for my Unit; No

**77. (If yes to 76) Which sport?**

Scale: Running; Cycling; Swimming; Triathlon; Gymnastics; Weightlifting; Combat sports/Martial Arts; Ball sports; Racket sports; Track and Field; Other (please specify)

**78. (If yes to 76) How many hours per week do you normally train and / or compete?**

Scale: Up to 1 hour; between 1 – 3 hours; Between 3- 5 hours; Between 5 – 7 hours; Between 7 – 8 hours; 8 hours or more

**79. How many hours per week do you normally complete physical training as part of your job?**

Scale: Up to 1 hour; between 1 – 3 hours; Between 3- 5 hours; Between 5 – 7 hours; Between 7 – 8 hours; 8 hours or more

**80. What type of physical training do you currently do as part of your job?**

Scale: Running; Cycling; Swimming; Weightlifting; Gym exercises (eg: circuits, cross trainer, gym stair climber); Military specific training (e.g., load carriage, combat physical training); None; Other (please specify)

**81. How many hours per week do you normally complete physical training in your personal time?**

Scale: Up to 1 hour; 1 – 3 hours; 3- 5 hours; 5 – 7 hours; 7 – 8 hours; 8 hours or more

**82. What type of physical training do you do in your personal time?**

Scale: Running; Cycling; Swimming; Weightlifting; Gym exercises (eg: circuits, cross trainer, gym stair climber); Team sports; Military specific training (e.g., load carriage, combat physical training); Other (please specify)

**83. Has the amount of exercise you do changed since the initial COVID-19 'Lockdown' on 23<sup>rd</sup> March 2020?**

Scale: No; I exercise a lot more now; I exercise a bit more now; I exercise a bit less now; I exercise a lot less now.

**84. Have you missed any training in the last year due to injuries?**

Scale: No, not at all; Yes, once or twice; Yes, three or four times; Yes, five or more times

**85. If yes to 84, how many days were you absent from training or work due to injuries in the last year?**

Scale: 1-7 days; 8-14 days; 15-21 days; 22 days or more.

**86. If yes to 84, what type of injury did you have?**

Scale: Soft tissue injury (muscle, tendon, ligament) – lower body; Soft tissue injury (muscle, tendon, ligament) – upper body; Bone fracture – lower body; Bone stress injury – lower body; Bone fracture – upper body; Bone stress injury – upper body; Dislocation – upper body; Dislocation – lower body; Head/neck injury; Back/spine injury; Hip injury (if none of the above); Ankle/foot injury (if none of the above); Army injury (if none of the above); Other (please specify)

**87. Have you missed any training in the last year due to illness?**

Scale: No, not at all; Yes, once or twice; Yes, three or four times; Yes, five or more times

**88. (If yes to 87) How many days were you absent from training or work due to illness in the last year?**

Scale: 1-7 days; 8-14 days; 15-21 days; 22 days or more.

**89. (If yes to 87) What type of illness did you have?**

Scale: Cold or flu; Diarrhoea, stomach illness or vomiting; Other

**90. Do you ever get a gaseous or bloated feeling in your stomach that is not related to your period?**

Scale: Yes, several times a day; Yes, several times a week; Yes, once or twice a week or more; Rarely or never.

**91. Do you ever get cramps or stomach-ache that is not related to your period?**

Scale: Yes, several times a day; Yes, several times a week; Yes, once or twice a week or more; Rarely or never.

**92. How often do you have bowel movements on average?**

Scale: Several times a day; Once a day; Every second day; Twice a week; Once a week or more rarely.

**93. How would you describe your normal stool?**

Scale: Normal (soft); Diarrhoea-like (watery); Hard and dry

**Section E: About Your Periods (LEAF-Q [94 to 95, 98 to 99, and 101 to 113])**

For 'free text' answers, please do not include any information that may identify you.

**94. Do you use hormonal contraceptives?** (Hormonal contraceptives are defined as, a method of contraception that alters the hormonal profile to prevent pregnancy and/or to control the menstrual cycle. These include, the combined pill, the 'mini' pill (progesterone only), the contraceptive implant or injection, or the Mirena coil).

Scale: Yes; No

**95. (If yes to 94) What type of hormonal contraceptive do you currently use?**

Scale: Combined Oral Contraceptive Pill (e.g., Microgynon); Progesterone Only Oral Contraceptive Pill/Mini Pill (e.g., Micronor); Contraceptive Implant (e.g., Nexplanon); Contraceptive Injection (e.g., Depo-Provera); Hormonal Intrauterine Device (e.g., Mirena Coil); Vaginal ring; Other (please specify)

**96. (If yes to 94) How long have you used your current hormonal contraceptive for?**

Scale: Less than 1 year; 1-2 years; 2-5 years; 5 years or more

**97. (If yes to 94) Why do you use hormonal contraceptives?**

Scale: To prevent pregnancy; Reduce period pains; Reduce bleeding; To regulate the menstrual cycle in relation to performance or work; Other (please specify)

**98. (If no to 94) Have you ever used hormonal contraceptives?**

Scale: Yes; No

**99. (If yes to 98) What type?**

Scale: Combined Oral Contraceptive Pill (e.g., Microgynon); Progesterone Only Oral Contraceptive Pill/Mini Pill (e.g., Micronor); Contraceptive Implant (e.g., Nexplanon); Contraceptive Injection (e.g., Depo-Provera); Hormonal Intrauterine Device (e.g., Mirena Coil); Vaginal ring; Other (please specify)

**100. (If yes to 98) How long did you use it/them for?**

Scale: (short free text)

**101. How old were when you had your first period?**

Scale: 11 years or younger; 12-14 years; 15 years or older; I do not remember; I have never had a period

**102. (if yes to 100) Did your first period come naturally (without medical intervention)?**

Scale: Yes; No; I do not remember

**103. (If no to 100) What kind of treatment was used to start your periods?**

Scale: Hormonal treatment; Weight gain; Reduced volume of exercise; Other

**104. (If 'I've never had a period' is not selected for question 100) Do you have normal periods?** A normal period is 9 days or less in duration and not so heavy as to soak through personal hygiene products

Scale: Yes; No; Not applicable due to the hormonal contraceptive I currently use

**105. (If 'I've never had a period' is not selected for question 100) Are your periods painful (impact on your daily function)?**

Scale: Yes; No; Somewhat

**106. (If 'I've never had a period' is not selected for question 101) When was your last period?**

Scale: 0-4 weeks ago; 1-2 months ago; 3-4 months ago; 5 months ago or more

**107. (If 'I've never had a period' is not selected for question 101) Are your periods regular? (every 21 to 34 days)**

Scale: Yes; No

**108. (If 'I've never had a period' is not selected for question 101) How many days do you normally bleed?**

Scale: 1-2 days; 3-4 days; 5-6 days; 7-8 days; 9 days or more

**109. (If 'I've never had a period' is not selected for question 101) Have you ever had heavy menstrual bleeding?** A good indication that your periods are heavy is if you: are having to change your sanitary products every hour or 2; are passing blood clots larger than 2.5cm (about the size of a 10p coin; are bleeding through your clothes or bedding; need to use 2 types of sanitary products together (for example, tampons and pads).

Scale: Yes; No

**110. How many periods have you had during the last year?**

Scale: 12 or more; 9-11; 6-8; 3-5; 0-2; None due to the hormonal contraceptive I currently use

**111. Have your periods ever stopped for 3 consecutive months or longer (besides pregnancy or because of contraception)?**

Scale: No, never; Yes, previously; Yes, now

**112. Do your periods change when you increase your exercise intensity, frequency, or duration?**

Scale: Yes; No

**113. If yes to 112, how?**

Scale: I bleed less; I bleed fewer days; My periods stop; I bleed more; I bleed more days

**114. Have your periods changed since the initial COVID-19 'Lockdown' on 23<sup>rd</sup> March 2020?**

Scale: Yes; No

**115. If yes to 114, how?**

Scale: I bleed less; I bleed fewer days; My periods stop; I bleed more; I bleed more days

**116. Have you have ever been diagnosed as anaemic or as having low iron?**

Scale: Yes; No

## **Section 6: Bone Health**

For the 'free text' answers, please do not include any information that may identify you.

**117. Have you ever been diagnosed with a bone stress injury (stress response and/or a stress fracture due to over-exercise and not related to a physical trauma)?**

Scale: Yes, between 12 and 18 years old; Yes, during basic training; Yes, during trade training; Yes, during other military training; Yes, during military duty outside of training; Yes, for reasons other than military duty; No, I have never had a stress fracture; Not sure

**118. (If yes to 117) How many bone stress injuries have you had?**

Scale: 1; 2; 3; 4; 5; More than 5

**119. (If yes to 117) How long ago was your bone stress injury?**

Scale: Within the last year; 1 – 2 years ago; 2 – 3 years ago; 3 – 4 years ago; 4 – 5 years ago; More than 5 years ago

**120. (If yes to 117) Have you ever had more than one bone stress injury in a year?**

Scale: Yes; No

**121. (If yes to 117) Where was the location of the stress fracture?**

Scale: Foot; Shin; Hip/Pelvis; Other (please specify)

**122. (If yes to 117) Were you having regular periods at the time of your stress fracture?**

Scale: Yes; No; I don't know

**123. Have you ever been diagnosed with osteopenia or low bone mineral density?**

Scale: Yes; No

**124. Do you have a family history of osteoporosis?**

Scale: Yes; No; I don't know

## **Section 7: Anxiety**

**125. Have you ever had anxiety or depression or anxiety that has required professional and/or medical treatment?**

Scale: Yes/No

**126. Has your mental health changed since the initial COVID-19 'Lockdown' on 23<sup>rd</sup> March 2020?**

Scale: No; Yes, it is significantly better; Yes, it is slightly better; Yes, it is slightly worse; Yes, it is significantly worse

Over the last 2 weeks, how often have you been bothered by the following problems?

**127. Feeling nervous, anxious or on edge**

Scale: Not at all; several days; more than half the days; nearly every day

**128. Not being able to stop or control worrying**

Scale: Not at all; several days; more than half the days; nearly every day

**129. Worrying too much about different things**

Scale: Not at all; several days; more than half the days; nearly every day

**130. Trouble relaxing**

Scale: Not at all; several days; more than half the days; nearly every day

**131. Being so restless that it is hard to sit still**

Scale: Not at all; several days; more than half the days; nearly every day

**132. Becoming easily annoyed or irritable**

Scale: Not at all; several days; more than half the days; nearly every day

**133. Feeling afraid as if something awful might happen**

Scale: Not at all; several days; more than half the days; nearly every day

**134. If you checked off any problems, how difficult have these problems made it for you to do your work, take care of things at home, or get along with other people?**

Scale: Not difficult at all; somewhat difficult; very difficult; extremely difficult; Not applicable

## **Section 8: Depression**

Over the last 2 weeks, how often have you been bothered by any of the following problems?

**135. Little interest or please in doing things?**

Scale: Not at all; several days; more than half the days; nearly every day

**136. Feeling down, depressed, or hopeless?**

Scale: Not at all; several days; more than half the days; nearly every day

**137. Trouble falling or staying asleep, or sleeping too much?**

Scale: Not at all; several days; more than half the days; nearly every day

**138. Feeling tired or having little energy**

Scale: Not at all; several days; more than half the days; nearly every day

**139. Poor appetite or overeating?**

Scale: Not at all; several days; more than half the days; nearly every day

**140. Feeling bad about yourself – or that you are a failure or have let yourself or your family down?**

Scale: Not at all; several days; more than half the days; nearly every day

**141. Trouble concentrating on things, such as reading the newspaper or watching television?**

Scale: Not at all; several days; more than half the days; nearly every day

**142. Moving or speaking so slowly that other people could have noticed? Or the opposite – being too fidgety or restless that you have been moving around a lot more than usual?**

Scale: Not at all; several days; more than half the days; nearly every day

**143. Thoughts that you would be better off dead, or of hurting yourself in some way?**

Scale: Not at all; several days; more than half the days; nearly every day

**144. If you checked off any problems, how difficult have these problems made it for you to do your work, take care of things at home, or get along with other people?**

Scale: Not difficult at all; somewhat difficult; very difficult; extremely difficult; Not applicable

## Section 9: Stress

The questions in this scale ask you about your feelings and thoughts during the **last month**. In each case, you will be asked to indicate how **often** you felt or thought a certain way. Although some of the questions are similar, there are differences between them, and you should treat each one as a separate question.

**145. In the last month, how often have you been upset because of something that happened unexpectedly?**

Scale: Never; almost never; sometimes; fairly often; very often

**146. In the last month, how often have you felt that you were unable to control the important things in your life?**

Scale: Never; almost never; sometimes; fairly often; very often

**147. In the last month, how often have you felt nervous and “stressed”?**

Scale: Never; almost never; sometimes; fairly often; very often

**148. In the last month, how often have you felt confident about your ability to handle your personal problems?**

Scale: Never; almost never; sometimes; fairly often; very often

**149. In the last month, how often have you felt that things were going your way?**

Scale: Never; almost never; sometimes; fairly often; very often

**150. In the last month, how often have you found that you could not cope with all the things you had to do?**

Scale: Never; almost never; sometimes; fairly often; very often

**151. In the last month, how often have you been able to control irritations in your life?**

Scale: Never; almost never; sometimes; fairly often; very often

**152. In the last month, how often have you felt that you were on top of things?**

Scale: Never; almost never; sometimes; fairly often; very often

**153. In the last month, how often have you been angered because of things that were outside of your control?**

Scale: Never; almost never; sometimes; fairly often; very often

**154. In the last month, how often have you felt difficulties were piling up so high that you could not overcome them?**

Scale: Never; almost never; sometimes; fairly often; very often



## Section 10: Resilience

The questions in this scale ask you about your resilience. Please answer the following statements as they apply to you over the **last month**. If a particular situation has not occurred recently, answer according to how you would have think you would have felt.

**155. I am able to adapt when changes occur.**

Scale: Not at all true; rarely true; sometimes true; often true; true nearly all the time

**156. I can deal with whatever comes my way.**

Scale: Not at all true; rarely true; sometimes true; often true; true nearly all the time

**157. I try to see the humorous side of things when I am faced with problems.**

Scale: Not at all true; rarely true; sometimes true; often true; true nearly all the time

**158. Having to cope with stress can make me stronger.**

Scale: Not at all true; rarely true; sometimes true; often true; true nearly all the time

**159. I tend to bounce back after illness, injury, or other hardships.**

Scale: Not at all true; rarely true; sometimes true; often true; true nearly all the time

**160. I believe I can achieve my goals, even if there are obstacles.**

Scale: Not at all true; rarely true; sometimes true; often true; true nearly all the time

**161. Under pressure, I stay focussed and think clearly.**

Scale: Not at all true; rarely true; sometimes true; often true; true nearly all the time

**162. I am not easily discouraged by failure.**

Scale: Not at all true; rarely true; sometimes true; often true; true nearly all the time

**163. I think of myself as a strong person when dealing with life's challenges and difficulties.**

Scale: Not at all true; rarely true; sometimes true; often true; true nearly all the time

**164. I am able to handle unpleasant or painful feelings like sadness, fear, and anger.**

Scale: Not at all true; rarely true; sometimes true; often true; true nearly all the time

## **Section 11: Physical Performance**

### **Army**

**165. When was your last physical performance test?**

Scale: Less than 3 months ago; 3 to 6 months ago; 6 to 12 months ago; More than 12 months ago

**166. What was your latest 2 km run time or multi-stage fitness test result?**

Scale: Short free text

**167. What was your latest broad jump score?**

Scale: Short free text

**168. What was your latest medicine ball throw score?**

Scale: Short free text

**169. What was your latest deadlift (hexbar lift) score?**

Scale: Short free text

**170. What was your latest 100 m shuttle sprint score?**

Scale: Short free text

**171. What was your latest pull-up score?**

Scale: Short free text

### **Navy**

**172. When was your last physical performance test?**

Scale: Less than 3 months ago; 3 to 6 months ago; 6 to 12 months ago; More than 12 months ago

**173. What was your latest 2.4 km run time, multi-stage fitness test result, or Rockport walk score?**

Scale: Short free text

**174. What was your latest strength test score?**

Scale: Short free text

### **Royal Air Force**

**175. When was your last physical performance test?**

Scale: Less than 3 months ago; 3 to 6 months ago; 6 to 12 months ago; More than 12 months ago

**176. What was your latest multi-stage fitness test or Rockport Walk test result?**

Scale: Short free text

**177. What was your latest press-up score?**

Scale: Short free text

**178. What was your latest sit-up score?**

Scale: Short free text
